# Supplementary material
Source: PubMed Central journal article supplement (PMC4323739)
Supplement: NIHMS649697-supplement-1.pdf [file NIHMS649697-supplement-1.pdf]

1  
2  
3  
4  
5  
6

**Barcoding of live human PBMC for multiplexed mass cytometry**

Henrik E. Mei <sup>†</sup>, Michael D. Leipold <sup>†</sup>, Axel Ronald Schulz <sup>†§</sup>, Cariad Chester <sup>†‡</sup>, and  
Holden T. Maecker <sup>†</sup>

- supplementary material: three figures and one table -

**Figure S1**

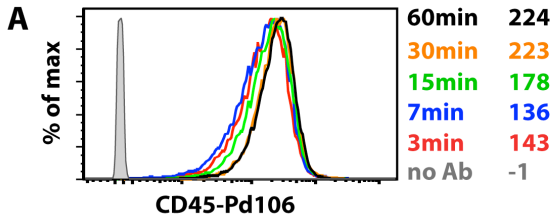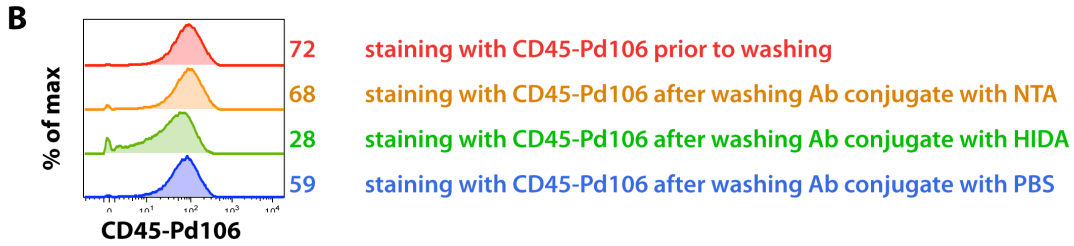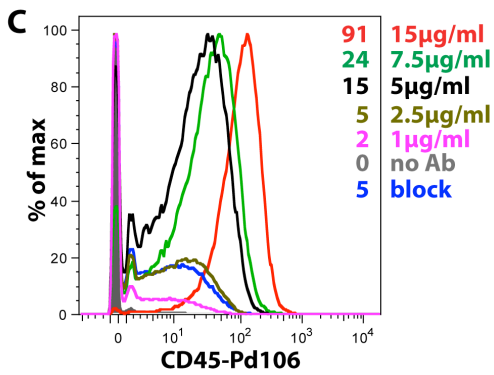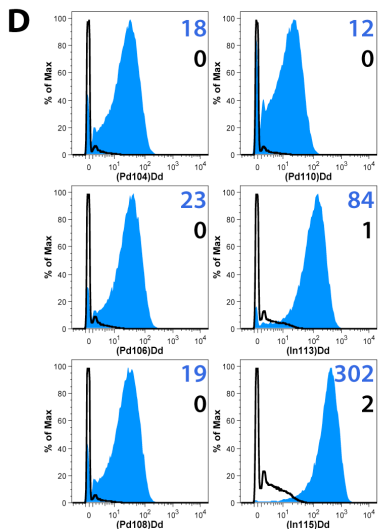

CD45 →  
 blocking by pre-incubation  
 with 10x concentration unlabeled  
 CD45 Ab (black)  
 stain (blue)

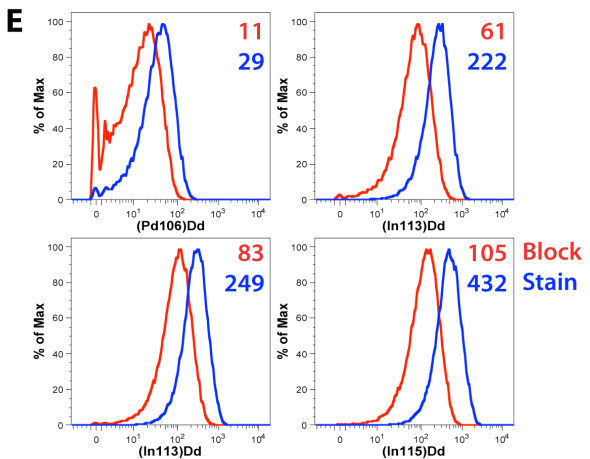

CD45 →

|                                      |                                      |
|--------------------------------------|--------------------------------------|
| block of CD45-Pd106<br>by CD45-In113 | block of CD45-In113<br>by CD45-Pd106 |
| block of CD45-In113<br>by CD45-In115 | block of CD45-In115<br>by CD45-In113 |

1 Figure S1. Validation of the CD45-Pd conjugates

2 (A) PBMC were stained with CD45-Pd106 conjugates that underwent differing conjugation  
3 reaction times as indicated. (B) PBMC were stained with CD45-Pd106 that was either left  
4 untreated, or was washed three times with counter chelators NTA or HIDA, or with PBS. Pd106  
5 signal intensities were similar confirming high affinity binding/chelation of Pd to the Ab. (C)  
6 PBMC were stained with different concentrations of CD45-Pd106. Resulting Pd106 signal  
7 intensities were concentration dependent. In histograms showing 2.5 $\mu\text{g} / \text{mL}$ , 1  $\mu\text{g} / \text{mL}$ , “block”  
8 and “no Ab”, cells of the left histogram leg merge into the peak representing cells with no Pd106  
9 signal, between -1 and 0. Thus, the signal distribution is non-Gaussian in these histograms. (D)  
10 PBMC were stained with CD45-Pd104, CD45-Pd106, CD45-Pd108, CD45-Pd110, CD45-In113,  
11 or CD45-In115 (all 5  $\mu\text{g}/\text{mL}$ ), with or without prior incubation with 50  $\mu\text{g}/\text{mL}$  unlabeled CD45  
12 Ab. Pre-incubation with excess unlabeled CD45 Ab resulted in the inhibition of the later staining  
13 with labeled Ab. (E) PBMC were sequentially stained with CD45-Pd106, CD45-In113, or CD45-  
14 In115 (all 5  $\mu\text{g}/\text{mL}$ ) in the indicated combinations. In- and Pd-labeled CD45 Ab showed similar  
15 capabilities of blocking secondary CD45 staining or of being blocked by pre-incubation with  
16 differently labeled CD45 Ab. Numbers in A-E indicate geometric mean signal intensities.

17  
18  
19  
20  
21  
22

Figure S2

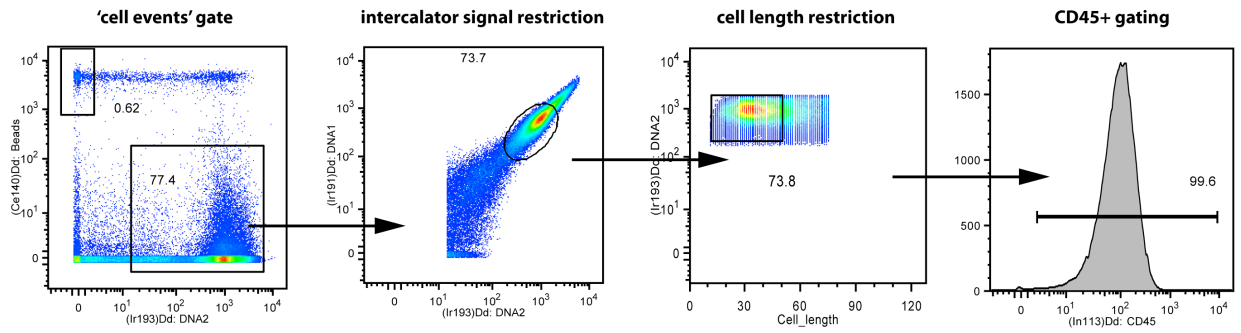

Figure S2. Gating strategy and selection for CD45<sup>+</sup> cells in individually-processed control PBMC samples

Gating strategy based on DNA staining and 'cell length' parameter as well as CD45-In113 staining.

Figure S3

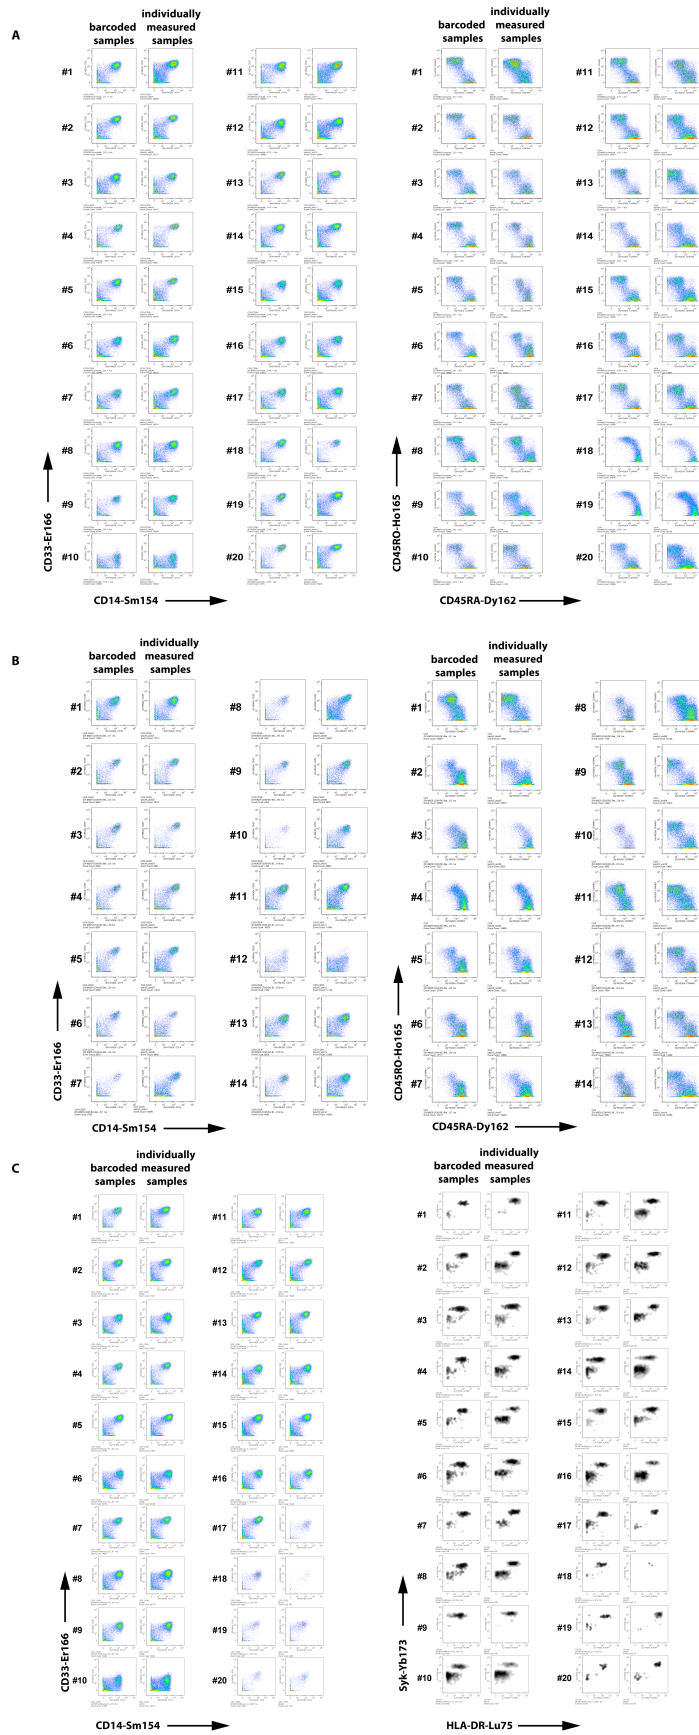

1 Figure S3. Reproduction of distinctive features of individual samples from barcoded and  
2 deconvoluted sample data.  
3 Series of biaxial dotplots comparing barcoded and individually measured sample from  
4 Experiment 1 (A), Experiment 2 (B) and Experiment 3 (C). Biaxial dotplots depicting CD33 vs.  
5 CD14 expression are shown where monocytes appear as a separate CD14<sup>+</sup>CD33<sup>+</sup> population. The  
6 parent population was gated for CD20<sup>-</sup>CD3<sup>-</sup> cells events. Note that monocytes in two samples  
7 (left panels in A: #10; B: #12, and C: #10) show low or no CD33 expression in both the  
8 individually measured as well as in the barcoded sample data. Such CD14<sup>+</sup>CD33<sup>low/-</sup> monocytes  
9 are not observed in any other barcoded sample, thus confirming the retrieval of the barcoded and  
10 only the barcoded cells by the deconvolution strategy. Similar correlations are observed for  
11 CD45RA vs. CD45RO staining patterns exhibited by CD3<sup>+</sup>CD20<sup>-</sup>CD4<sup>+</sup> T cells (right panels in A  
12 and B) and for Syk vs. HLA-DR staining pattern exhibited by an extremely rare population of  
13 CD3<sup>-</sup>CD20<sup>-</sup>CD14<sup>-</sup>CD33<sup>-</sup>CD123<sup>+</sup> cells (right panel in C). Syk<sup>high</sup>HLA-DR<sup>high</sup> cells represent  
14 plasmacytoid dendritic cells while Syk<sup>low</sup>HLA-DR<sup>-</sup> events represent basophils.

15  
16  
17  
18  
19  
20  
21  
22  
23  
24

1 Table SI. Antibodies used in this study\*\*

| <b>antibody target</b> | <b>clone</b> | <b>label</b> | <b>conjugation</b> | <b>source</b>   |
|------------------------|--------------|--------------|--------------------|-----------------|
| CD9                    | HI9a         | Pr141        | in house           | Biolegend       |
| CD19                   | HIB19        | Nd142        | in house           | Biolegend       |
| CD4                    | SK3          | Nd143        | in house           | Biolegend       |
| CD8                    | SK1          | Nd144        | in house           | Biolegend       |
| IgD                    | IA6-2        | Nd146        | in house           | Biolegend       |
| CD85j                  | 292319       | Sm147        | in house           | R & D Systems   |
| IgA                    | polyclonal   | Nd148        | Fluidigm           | Fluidigm        |
| CD16                   | 3G8          | Sm149        | in house           | Biolegend       |
| CD3                    | UCHT1        | Nd150        | in house           | BD Biosciences  |
| CD27                   | L128         | Sm152        | in house           | BD Biosciences  |
| CD62L                  | DREG-56      | Eu153        | Fluidigm           | Fluidigm        |
| CD14                   | M5E2         | Sm145        | in house           | Biolegend       |
| CD32                   | FLI8.26      | Gd155        | in house           | BD Biosciences  |
| CD94                   | HP-3D9       | Gd156        | in house           | BD Biosciences  |
| CD11c                  | Bu15         | Tb159        | Fluidigm           | Fluidigm        |
| CCR7                   | 150503       | Gd160        | in house           | R & D Systems   |
| CD45RA                 | HI100        | Dy162        | in house           | Biolegend       |
| BDCA3                  | AD5-14H12    | Dy163        | in house           | Miltenyi Biotec |
| CD20                   | 2H7          | Dy164        | in house           | Biolegend       |
| CD45RO                 | UCHL1        | Ho165        | Fluidigm           | Fluidigm        |
| CD33                   | P67.6        | Er166        | in house           | Santa Cruz      |
| CD28                   | L293         | Er167        | in house           | BD Biosciences  |
| CD24                   | ML5          | Er168        | in house           | Biolegend       |
| CD25                   | 2A3          | Tm169        | Fluidigm           | Fluidigm        |
| CD161                  | DX12         | Er170        | in house           | BD Biosciences  |
| TCRgd                  | B1           | Yb171        | in house           | Biolegend       |
| CD38                   | HIT2         | Yb172        | Fluidigm           | Fluidigm        |
| cyt Syk                | 4D10         | Yb173        | in house           | BD Biosciences  |
| HLADR                  | G46-6        | Lu175        | in house           | BD Biosciences  |
| CD56                   | HCD56        | Yb176        | in house           | Biolegend       |
| CD43                   | 84-3C1       | Nd150        | Fluidigm           | Fluidigm        |
| CD123                  | 6H6          | Eu151        | Fluidigm           | Fluidigm        |
| CD86                   | IT2.2        | Gd157        | in house           | Biolegend       |
| CD3                    | UCHT1        | Er170        | Fluidigm           | Fluidigm        |
| CD66b                  | CD66a-B1.1   | Yb171        | Fluidigm           | Fluidigm        |
| mouse CD45             | 30-F11       | La139        | in house           | Biolegend       |
| CD45                   | Hi30         | Pd104        | in house           | Biolegend       |
| CD45                   | Hi30         | Pd106        | in house           | Biolegend       |
| CD45                   | Hi30         | Pd108        | in house           | Biolegend       |
| CD45                   | Hi30         | Pd110        | in house           | Biolegend       |

|      |      |       |          |           |
|------|------|-------|----------|-----------|
| CD45 | Hi30 | In113 | in house | Biologend |
| CD45 | Hi30 | In115 | in house | Biologend |

1  
2 \*\*Antibodies labeled in-house were conjugated using MAXPAR<sup>®</sup> conjugation kits (Fluidigm,  
3 Sunnyvale, CA) according to a protocol based on the manufacturer's instructions, or as described  
4 in "Materials and Methods".

5
